# Supplementary material for: Health behavior of Austrian tertiary students focusing on diet type linked to sports and exercise—first glimpse of results from the “sustainably healthy—from science 2 high school and university” study
Source: PubMed Central journal article supplement (PMC10392833; doi:10.3389/fpubh.2023.1129004), 2023-07-18
Supplement: Table_1.pdf [file Table_1.pdf]

## *Appendix*

### **Health Behaviors of Austrian Tertiary Students focusing on Diet Type linked to Sports & Exercise – First Glimpse of Results from the “Sustainably healthy – From Science 2 Highschool & University” Study**

**1 Supplementary Data**

----

**2 Supplementary Matrial: Tables A1 to A4**

**Table A1:** Anthropometric Characteristics by federal state and living environment in bachelor students (n = 3780) presented as mean  $\pm$  SD and prevalence (%) for the overweight/obesity category.

|               | N    | Age (years)     | Height (cm)      | Body Weight (kg) | BMI (kg/m <sup>2</sup> ) | Overweight/Obesity (%) |
|---------------|------|-----------------|------------------|------------------|--------------------------|------------------------|
| Burgenland    | 113  | 24.7 $\pm$ 7.5  | 169.8 $\pm$ 10.2 | 66.5 $\pm$ 15.8  | 22.9 $\pm$ 3.9           | 22.1                   |
| Urban         | 27   | 26.4 $\pm$ 8.7  | 168.9 $\pm$ 9.7  | 65.0 $\pm$ 17.7  | 22.5 $\pm$ 4.3           | 18.5                   |
| Rural         | 86   | 24.2 $\pm$ 7.0  | 170.1 $\pm$ 10.4 | 67.0 $\pm$ 15.2  | 23.0 $\pm$ 3.9           | 23.3                   |
| Carinthia     | 31   | 28.6 $\pm$ 11.2 | 167.1 $\pm$ 11.2 | 65.2 $\pm$ 16.2  | 23.3 $\pm$ 4.5           | 22.6                   |
| Urban         | 18   | 26.8 $\pm$ 10.4 | 165.2 $\pm$ 12.2 | 65.2 $\pm$ 17.5  | 23.8 $\pm$ 5.4           | 22.2                   |
| Rural         | 13   | 31.0 $\pm$ 12.2 | 169.6 $\pm$ 9.6  | 65.2 $\pm$ 14.8  | 22.5 $\pm$ 3.1           | 23.1                   |
| Lower Austria | 255  | 23.5 $\pm$ 6.5  | 170.5 $\pm$ 9.0  | 66.8 $\pm$ 15.0  | 22.9 $\pm$ 4.1           | 19.6                   |
| Urban         | 97   | 23.7 $\pm$ 6.1  | 171.0 $\pm$ 8.8  | 67.1 $\pm$ 15.1  | 22.9 $\pm$ 4.2           | 19.6                   |
| Rural         | 158  | 23.4 $\pm$ 6.7  | 170.2 $\pm$ 9.1  | 66.6 $\pm$ 14.9  | 22.9 $\pm$ 4.0           | 19.6                   |
| Salzburg      | 107  | 23.0 $\pm$ 4.6  | 168.2 $\pm$ 8.1  | 61.6 $\pm$ 11.4  | 21.7 $\pm$ 3.4           | 14.0                   |
| Urban         | 55   | 23.1 $\pm$ 4.9  | 168.8 $\pm$ 8.6  | 59.6 $\pm$ 9.0   | 20.9 $\pm$ 2.7           | 9.1                    |
| Rural         | 52   | 22.8 $\pm$ 4.4  | 167.5 $\pm$ 7.6  | 63.7 $\pm$ 13.2  | 22.6 $\pm$ 3.9           | 19.2                   |
| Styria        | 321  | 23.5 $\pm$ 6.1  | 170.2 $\pm$ 8.4  | 65.5 $\pm$ 12.9  | 22.5 $\pm$ 3.5           | 17.8                   |
| Urban         | 162  | 24.3 $\pm$ 7.2  | 171.0 $\pm$ 8.6  | 66.9 $\pm$ 13.6  | 22.8 $\pm$ 3.8           | 19.8                   |
| Rural         | 159  | 22.7 $\pm$ 4.6  | 169.3 $\pm$ 8.2  | 64.0 $\pm$ 12.0  | 22.2 $\pm$ 3.2           | 15.7                   |
| Tyrol         | 811  | 23.5 $\pm$ 6.2  | 170.4 $\pm$ 8.1  | 64.8 $\pm$ 12.7  | 22.2 $\pm$ 3.5           | 16.0                   |
| Urban         | 388  | 23.8 $\pm$ 6.2  | 171.3 $\pm$ 8.4  | 65.4 $\pm$ 12.8  | 22.2 $\pm$ 3.6           | 16.2                   |
| Rural         | 423  | 23.1 $\pm$ 6.2  | 169.5 $\pm$ 7.7  | 64.2 $\pm$ 12.6  | 22.2 $\pm$ 3.4           | 15.9                   |
| Upper Austria | 473  | 24.0 $\pm$ 6.4  | 170.1 $\pm$ 8.8  | 65.2 $\pm$ 13.1  | 22.5 $\pm$ 3.6           | 17.5                   |
| Urban         | 217  | 24.2 $\pm$ 5.9  | 170.2 $\pm$ 8.7  | 64.8 $\pm$ 13.5  | 22.3 $\pm$ 3.7           | 15.2                   |
| Rural         | 256  | 23.8 $\pm$ 6.8  | 170.0 $\pm$ 8.8  | 65.6 $\pm$ 12.8  | 22.6 $\pm$ 3.6           | 19.5                   |
| Vienna        | 1607 | 22.9 $\pm$ 5.0  | 173.2 $\pm$ 9.4  | 68.0 $\pm$ 14.3  | 22.6 $\pm$ 3.8           | 18.7                   |
| Urban         | 1268 | 23.1 $\pm$ 4.9  | 173.4 $\pm$ 9.4  | 68.2 $\pm$ 14.2  | 22.6 $\pm$ 3.7           | 17.9                   |
| Rural         | 339  | 22.4 $\pm$ 5.1  | 172.3 $\pm$ 9.4  | 67.1 $\pm$ 14.7  | 22.5 $\pm$ 3.9           | 21.8                   |
| Vorarlberg    | 61   | 23.7 $\pm$ 5.5  | 168.9 $\pm$ 7.8  | 64.6 $\pm$ 16.2  | 22.5 $\pm$ 4.8           | 19.7                   |
| Urban         | 18   | 26.3 $\pm$ 7.1  | 171.5 $\pm$ 9.2  | 67.9 $\pm$ 17.9  | 22.9 $\pm$ 4.6           | 22.2                   |
| Rural         | 43   | 22.6 $\pm$ 4.3  | 167.7 $\pm$ 6.9  | 63.2 $\pm$ 15.5  | 22.4 $\pm$ 4.9           | 18.6                   |

**Table A2:** Anthropometric Characteristics by federal state and living environment in graduate students (n = 2361) presented as mean  $\pm$  SD and prevalence (%) for the overweight/obesity subsample.

|               | N    | Age (years)     | Height (cm)      | Body Weight (kg) | BMI (kg/m <sup>2</sup> ) | Overweight/Obesity (%) |
|---------------|------|-----------------|------------------|------------------|--------------------------|------------------------|
| Burgenland    | 25   | 27.7 $\pm$ 7.5  | 169.6 $\pm$ 7.9  | 65.6 $\pm$ 13.6  | 22.7 $\pm$ 3.6           | 24.0                   |
| Urban         | 12   | 26.5 $\pm$ 4.7  | 166.7 $\pm$ 8.2  | 60.2 $\pm$ 10.8  | 21.6 $\pm$ 3.3           | 16.7                   |
| Rural         | 13   | 28.8 $\pm$ 9.4  | 172.3 $\pm$ 6.9  | 70.7 $\pm$ 11.3  | 23.6 $\pm$ 3.7           | 30.8                   |
| Carinthia     | 13   | 28.2 $\pm$ 5.0  | 166.7 $\pm$ 8.3  | 66.6 $\pm$ 12.2  | 24.0 $\pm$ 3.9           | 38.5                   |
| Urban         | 7    | 30.4 $\pm$ 4.6  | 168.2 $\pm$ 9.2  | 70.1 $\pm$ 15.2  | 24.7 $\pm$ 4.7           | 42.9                   |
| Rural         | 6    | 25.7 $\pm$ 4.5  | 164.8 $\pm$ 7.5  | 62.5 $\pm$ 6.5   | 23.1 $\pm$ 2.8           | 33.3                   |
| Lower Austria | 74   | 28.7 $\pm$ 7.8  | 171.9 $\pm$ 8.5  | 69.1 $\pm$ 13.5  | 23.4 $\pm$ 4.3           | 24.3                   |
| Urban         | 26   | 28.6 $\pm$ 7.5  | 172.4 $\pm$ 10.2 | 66.8 $\pm$ 12.8  | 22.3 $\pm$ 3.0           | 11.5                   |
| Rural         | 48   | 28.7 $\pm$ 8.0  | 171.6 $\pm$ 7.6  | 70.3 $\pm$ 13.8  | 23.9 $\pm$ 4.8           | 31.3                   |
| Salzburg      | 71   | 27.3 $\pm$ 6.6  | 173.2 $\pm$ 9.7  | 69.4 $\pm$ 17.6  | 22.9 $\pm$ 4.4           | 25.4                   |
| Urban         | 52   | 27.1 $\pm$ 5.5  | 173.5 $\pm$ 10.7 | 70.3 $\pm$ 19.3  | 23.1 $\pm$ 4.8           | 25.0                   |
| Rural         | 19   | 28.1 $\pm$ 9.0  | 172.5 $\pm$ 6.4  | 66.8 $\pm$ 12.1  | 22.3 $\pm$ 2.9           | 26.3                   |
| Styria        | 137  | 26.5 $\pm$ 5.6  | 173.3 $\pm$ 9.4  | 67.9 $\pm$ 12.0  | 22.5 $\pm$ 3.3           | 16.8                   |
| Urban         | 106  | 26.6 $\pm$ 5.8  | 173.5 $\pm$ 9.4  | 67.4 $\pm$ 12.0  | 22.3 $\pm$ 3.1           | 15.1                   |
| Rural         | 31   | 26.2 $\pm$ 5.3  | 172.5 $\pm$ 9.4  | 69.5 $\pm$ 12.0  | 23.4 $\pm$ 4.0           | 22.6                   |
| Tyrol         | 487  | 26.3 $\pm$ 6.2  | 171.6 $\pm$ 9.1  | 66.8 $\pm$ 12.9  | 22.6 $\pm$ 3.4           | 19.1                   |
| Urban         | 344  | 26.3 $\pm$ 5.7  | 171.9 $\pm$ 9.3  | 66.4 $\pm$ 113.4 | 22.4 $\pm$ 3.3           | 17.4                   |
| Rural         | 143  | 26.3 $\pm$ 7.4  | 171.0 $\pm$ 8.7  | 67.5 $\pm$ 11.8  | 23.0 $\pm$ 3.4           | 23.1                   |
| Upper Austria | 133  | 30.0 $\pm$ 8.9  | 172.2 $\pm$ 9.4  | 68.4 $\pm$ 15.3  | 23.0 $\pm$ 4.0           | 18.8                   |
| Urban         | 79   | 29.1 $\pm$ 7.6  | 172.5 $\pm$ 9.9  | 68.4 $\pm$ 15.4  | 22.8 $\pm$ 3.7           | 15.2                   |
| Rural         | 54   | 31.3 $\pm$ 10.6 | 171.7 $\pm$ 8.8  | 68.5 $\pm$ 15.3  | 23.1 $\pm$ 4.7           | 24.1                   |
| Vienna        | 1404 | 27.0 $\pm$ 5.7  | 173.3 $\pm$ 9.7  | 68.7 $\pm$ 14.6  | 22.8 $\pm$ 3.7           | 19.6                   |
| Urban         | 1228 | 27.1 $\pm$ 5.5  | 173.5 $\pm$ 9.8  | 68.8 $\pm$ 14.6  | 22.7 $\pm$ 3.6           | 18.9                   |
| Rural         | 176  | 26.5 $\pm$ 6.6  | 171.9 $\pm$ 8.5  | 68.4 $\pm$ 14.8  | 23.1 $\pm$ 4.3           | 24.4                   |
| Vorarlberg    | 17   | 32.5 $\pm$ 13.1 | 169.7 $\pm$ 9.1  | 68.1 $\pm$ 14.1  | 23.6 $\pm$ 4.3           | 17.6                   |
| Urban         | 8    | 36.9 $\pm$ 16.8 | 172.0 $\pm$ 12.1 | 69.6 $\pm$ 10.5  | 23.5 $\pm$ 2.6           | 12.5                   |
| Rural         | 9    | 28.6 $\pm$ 7.8  | 167.7 $\pm$ 5.4  | 66.7 $\pm$ 17.3  | 23.7 $\pm$ 5.6           | 22.2                   |

**Table A3:** Health-related behaviors by federal state and living environment in bachelor students (n = 3,780) presented as prevalence (%) and mean  $\pm$  SD for sport days per week

|               | N    | Leisure time sports (%) | Club-sports (%) | Days/week with sport (mean $\pm$ SD) | Daily Fruit Intake (%) | Daily Vegetable Intake (%) | Fluid intake >2L/day (%) | Water most common fluid (%) | Vegetarian /Vegan (%) | Alcohol Intake (%) | Smoking (%) |
|---------------|------|-------------------------|-----------------|--------------------------------------|------------------------|----------------------------|--------------------------|-----------------------------|-----------------------|--------------------|-------------|
| Burgenland    | 113  | 85.0                    | 17.6            | 3.1 $\pm$ 1.9                        | 48.4                   | 73.3                       | 34.7                     | 83.2                        | 20.4                  | 61.4               | 10.8        |
| Urban         | 27   | 85.2                    | 3.8             | 3.2 $\pm$ 1.8                        | 50.0                   | 75.0                       | 37.5                     | 75.0                        | 20.8                  | 59.1               | 9.1         |
| Rural         | 86   | 85.0                    | 22.4            | 3.0 $\pm$ 1.9                        | 47.9                   | 73.2                       | 33.8                     | 85.9                        | 20.3                  | 62.3               | 11.5        |
| Carinthia     | 31   | 83.3                    | 24.1            | 2.9 $\pm$ 1.8                        | 59.3                   | 70.4                       | 29.6                     | 77.8                        | 17.9                  | 68.2               | 18.2        |
| Urban         | 18   | 88.2                    | 25.0            | 3.3 $\pm$ 1.8                        | 66.7                   | 73.3                       | 20.0                     | 93.3                        | 18.8                  | 66.7               | 16.7        |
| Rural         | 13   | 76.9                    | 23.1            | 2.4 $\pm$ 1.7                        | 50.0                   | 66.7                       | 41.7                     | 58.3                        | 16.7                  | 70.0               | 20.0        |
| Lower Austria | 255  | 86.3                    | 27.2            | 2.9 $\pm$ 1.8                        | 52.5                   | 74.8                       | 31.7                     | 81.7                        | 20.0                  | 73.5               | 10.5        |
| Urban         | 97   | 90.1                    | 33.7            | 2.9 $\pm$ 2.6                        | 53.4                   | 78.1                       | 30.1                     | 87.7                        | 16.7                  | 67.7               | 3.1         |
| Rural         | 158  | 83.6                    | 23.2            | 2.9 $\pm$ 1.9                        | 51.9                   | 72.9                       | 32.6                     | 78.3                        | 22.0                  | 76.7               | 14.7        |
| Salzburg      | 107  | 85.6                    | 23.3            | 2.9 $\pm$ 2.0                        | 66.2                   | 81.8                       | 26.0                     | 85.7                        | 39.8                  | 72.2               | 15.3        |
| Urban         | 55   | 82.4                    | 16.7            | 2.7 $\pm$ 1.9                        | 63.4                   | 80.5                       | 24.4                     | 87.8                        | 43.5                  | 73.0               | 18.9        |
| Rural         | 52   | 89.1                    | 31.0            | 3.1 $\pm$ 2.1                        | 69.4                   | 83.3                       | 27.8                     | 83.3                        | 35.1                  | 71.4               | 11.4        |
| Styria        | 321  | 88.9                    | 25.5            | 3.2 $\pm$ 1.8                        | 59.1                   | 78.7                       | 40.2                     | 84.3                        | 28.5                  | 73.1               | 7.6         |
| Urban         | 162  | 87.5                    | 24.3            | 3.2 $\pm$ 1.9                        | 59.8                   | 81.1                       | 47.2                     | 89.0                        | 35.6                  | 74.4               | 9.9         |
| Rural         | 159  | 90.4                    | 26.8            | 3.2 $\pm$ 1.8                        | 58.3                   | 76.4                       | 33.1                     | 79.5                        | 21.1                  | 71.8               | 5.1         |
| Tyrol         | 811  | 87.5                    | 24.2            | 3.2 $\pm$ 1.9                        | 58.8                   | 78.1                       | 38.5                     | 84.1                        | 24.1                  | 73.8               | 12.5        |
| Urban         | 388  | 87.9                    | 20.2            | 3.2 $\pm$ 1.9                        | 59.1                   | 81.4                       | 42.5                     | 86.4                        | 29.4                  | 78.1               | 14.9        |
| Rural         | 423  | 87.2                    | 28.0            | 3.1 $\pm$ 1.9                        | 58.4                   | 75.0                       | 34.7                     | 81.9                        | 19.2                  | 69.8               | 10.4        |
| Upper Austria | 473  | 83.0                    | 24.8            | 3.0 $\pm$ 2.0                        | 62.6                   | 80.6                       | 38.7                     | 77.5                        | 28.1                  | 70.0               | 9.7         |
| Urban         | 217  | 82.3                    | 24.0            | 3.0 $\pm$ 2.0                        | 60.2                   | 84.9                       | 39.2                     | 79.5                        | 35.3                  | 67.9               | 12.8        |
| Rural         | 256  | 83.6                    | 25.5            | 2.9 $\pm$ 2.0                        | 64.5                   | 77.3                       | 38.4                     | 75.8                        | 22.5                  | 71.6               | 7.2         |
| Vienna        | 1607 | 80.3                    | 19.4            | 2.8 $\pm$ 2.0                        | 52.8                   | 78.4                       | 42.7                     | 83.7                        | 30.3                  | 70.9               | 13.9        |
| Urban         | 1268 | 79.7                    | 18.5            | 2.8 $\pm$ 2.0                        | 52.1                   | 78.4                       | 43.3                     | 83.5                        | 30.7                  | 73.2               | 15.2        |
| Rural         | 339  | 82.4                    | 22.8            | 3.1 $\pm$ 2.0                        | 55.3                   | 78.2                       | 40.4                     | 84.4                        | 28.8                  | 66.5               | 9.1         |
| Vorarlberg    | 61   | 79.7                    | 30.4            | 2.5 $\pm$ 1.8                        | 57.7                   | 75.0                       | 11.5                     | 75.0                        | 9.3                   | 80.9               | 19.1        |
| Urban         | 18   | 76.5                    | 35.3            | 2.9 $\pm$ 2.2                        | 43.8                   | 75.0                       | 12.5                     | 87.5                        | 12.5                  | 85.7               | 35.7        |
| Rural         | 43   | 81.0                    | 28.2            | 2.4 $\pm$ 1.8                        | 63.9                   | 75.0                       | 11.1                     | 69.4                        | 7.9                   | 78.8               | 12.1        |

**Table A4:** Health-related behaviors by federal state and living environment in graduate students (n = 2,361) presented as prevalence (%) and mean  $\pm$  SD for sport days per week

|               | N    | Leisure time sports (%) | Club-sports (%) | Days/week with sport (mean $\pm$ SD) | Daily Fruit Intake (%) | Daily Vegetable Intake (%) | Fluid intake >2L/day (%) | Water most common fluid (%) | Vegetarian /Vegan (%) | Alcohol Intake (%) | Smoking (%) |
|---------------|------|-------------------------|-----------------|--------------------------------------|------------------------|----------------------------|--------------------------|-----------------------------|-----------------------|--------------------|-------------|
| Burgenland    | 25   | 79.2                    | 13.0            | 2.7 $\pm$ 1.9                        | 61.9                   | 100.0                      | 42.9                     | 76.2                        | 19.2                  | 73.7               | 5.3         |
| Urban         | 12   | 81.8                    | 10.0            | 2.5 $\pm$ 1.5                        | 70.0                   | 100.0                      | 30.0                     | 60.0                        | 30.0                  | 62.5               | 0.0         |
| Rural         | 13   | 76.9                    | 15.4            | 2.9 $\pm$ 2.2                        | 54.5                   | 100.0                      | 54.5                     | 90.9                        | 8.3                   | 81.8               | 9.1         |
| Carinthia     | 13   | 90.9                    | 36.4            | 3.6 $\pm$ 1.7                        | 63.6                   | 63.6                       | 63.6                     | 90.1                        | 36.4                  | 81.8               | 27.3        |
| Urban         | 7    | 100.0                   | 40.0            | 3.8 $\pm$ 1.6                        | 60.0                   | 60.0                       | 60.0                     | 100.0                       | 40.0                  | 80.0               | 40.0        |
| Rural         | 6    | 83.3                    | 33.3            | 3.5 $\pm$ 2.0                        | 66.7                   | 66.7                       | 66.7                     | 66.7                        | 33.3                  | 83.3               | 16.7        |
| Lower Austria | 74   | 88.4                    | 27.3            | 3.0 $\pm$ 2.0                        | 47.6                   | 79.4                       | 46.0                     | 76.2                        | 26.6                  | 61.4               | 8.8         |
| Urban         | 26   | 87.0                    | 21.7            | 2.9 $\pm$ 1.9                        | 43.5                   | 87.0                       | 39.1                     | 69.6                        | 26.1                  | 54.5               | 18.2        |
| Rural         | 48   | 89.1                    | 30.2            | 3.1 $\pm$ 2.1                        | 50.0                   | 75.0                       | 50.0                     | 80.0                        | 26.8                  | 65.7               | 2.9         |
| Salzburg      | 71   | 93.9                    | 23.1            | 3.2 $\pm$ 1.8                        | 67.7                   | 90.3                       | 37.1                     | 90.3                        | 27.0                  | 61.5               | 11.5        |
| Urban         | 52   | 91.4                    | 23.4            | 3.2 $\pm$ 2.0                        | 66.7                   | 88.9                       | 37.7                     | 91.1                        | 30.4                  | 61.0               | 7.3         |
| Rural         | 19   | 100.0                   | 22.2            | 3.0 $\pm$ 1.2                        | 70.6                   | 94.1                       | 35.3                     | 88.2                        | 17.6                  | 63.6               | 27.3        |
| Styria        | 137  | 91.5                    | 22.4            | 3.5 $\pm$ 1.8                        | 59.6                   | 87.2                       | 49.5                     | 84.4                        | 33.9                  | 68.3               | 7.7         |
| Urban         | 106  | 92.9                    | 21.1            | 3.6 $\pm$ 1.8                        | 58.3                   | 89.3                       | 56.0                     | 85.7                        | 34.1                  | 70.0               | 7.5         |
| Rural         | 31   | 87.1                    | 26.7            | 3.2 $\pm$ 1.8                        | 64.0                   | 80.0                       | 28.0                     | 80.0                        | 33.3                  | 62.5               | 8.3         |
| Tyrol         | 487  | 91.7                    | 23.8            | 3.4 $\pm$ 1.9                        | 61.7                   | 85.5                       | 40.1                     | 84.2                        | 31.1                  | 73.8               | 9.8         |
| Urban         | 344  | 92.1                    | 20.8            | 3.4 $\pm$ 1.8                        | 62.0                   | 88.2                       | 43.3                     | 86.1                        | 35.3                  | 74.3               | 9.8         |
| Rural         | 143  | 90.7                    | 31.2            | 3.3 $\pm$ 2.1                        | 60.7                   | 78.6                       | 32.1                     | 79.5                        | 21.4                  | 72.5               | 9.8         |
| Upper Austria | 133  | 93.1                    | 22.3            | 3.0 $\pm$ 1.7                        | 60.0                   | 82.9                       | 47.6                     | 80.0                        | 26.4                  | 69.8               | 5.2         |
| Urban         | 79   | 92.5                    | 24.6            | 3.0 $\pm$ 1.8                        | 43.5                   | 80.6                       | 50.0                     | 83.9                        | 30.6                  | 76.8               | 3.6         |
| Rural         | 54   | 100.0                   | 19.1            | 3.0 $\pm$ 1.6                        | 65.1                   | 86.0                       | 44.2                     | 74.4                        | 20.5                  | 60.0               | 7.5         |
| Vienna        | 1404 | 86.1                    | 19.3            | 3.0 $\pm$ 1.9                        | 58.2                   | 83.3                       | 45.3                     | 84.6                        | 32.1                  | 73.4               | 12.4        |
| Urban         | 1228 | 86.3                    | 18.8            | 3.0 $\pm$ 1.9                        | 57.8                   | 84.3                       | 46.1                     | 84.9                        | 32.7                  | 74.1               | 13.2        |
| Rural         | 176  | 84.2                    | 22.9            | 2.8 $\pm$ 2.0                        | 61.2                   | 75.5                       | 39.6                     | 82.0                        | 27.9                  | 71.5               | 6.9         |
| Vorarlberg    | 17   | 87.5                    | 26.7            | 3.0 $\pm$ 1.9                        | 42.9                   | 57.1                       | 35.7                     | 92.9                        | 7.1                   | 76.9               | 15.4        |
| Urban         | 8    | 71.4                    | 0.0             | 1.8 $\pm$ 1.6                        | 0.0                    | 20.0                       | 20.0                     | 100.0                       | 0.0                   | 100.0              | 25.0        |
| Rural         | 9    | 100.0                   | 44.4            | 3.8 $\pm$ 1.6                        | 66.7                   | 77.8                       | 44.4                     | 88.9                        | 11.1                  | 66.7               | 11.1        |
